# Supplementary material for: A novel liquid biopsy-based approach for highly specific cancer diagnostics: mitigating false responses in assaying patient plasma-derived circulating microRNAs through combined SERS and plasmon-enhanced fluorescence analyses
Source: Royal Society of Chemistry journal article supplement (doi:10.1039/d0an00538j), 2020-01-01
Supplement: d0an00538j1.pdf [file d0an00538j1.pdf]

**Electronic Supplementary Information File For**

**A Novel Liquid Biopsy-Based Approach for Highly Specific Cancer  
Diagnostics: Mitigating False Responses in Assaying Patient Plasma-Derived  
Circulating microRNAs through Combined SERS and Plasmon-Enhanced  
Fluorescence Analyses**

Adrianna N. Masterson,<sup>a</sup> Thakshila Liyanage,<sup>a</sup> Claire Berman,<sup>a</sup> Hristos Kaimakliotis,<sup>b</sup> Merrell  
Johnson,<sup>c</sup> and Rajesh Sardar<sup>\*,a</sup>

<sup>a</sup>Department of Chemistry & Chemical Biology, Indiana University-Purdue University  
Indianapolis, 402 N. Blackford Street, Indianapolis, Indiana 46202, United States

<sup>b</sup>Department of Urology, Indiana University School of Medicine, 535 N. Barnhill Dr.  
Indianapolis, Indiana 46202, United States

<sup>c</sup>Department of Physics, Purdue University Fort Wayne, 2101 E. Coliseum Blvd.  
Fort Wayne, Indiana 46805, United States

**Table S1: -ssDNA (oligomer) sequences used for this study.**

| Name       | Sequence                             | Modification                             |
|------------|--------------------------------------|------------------------------------------|
| -ssDNA-10b | 5' CAC AAA TTC GGT TCT ACA GGG TA 3' | 3' Thiol-(CH <sub>2</sub> ) <sub>3</sub> |
| -ssDNA-96  | 5' AGC AAA AAT GTG CTA GTG CCA AA 3' | 3' Thiol-(CH <sub>2</sub> ) <sub>3</sub> |

**Table S2: microRNA sequences used for this study.**

| Name             | Sequence                      | Modification |
|------------------|-------------------------------|--------------|
| microRNA-10b     | 5' UACCCUGUAGAACCGAAUUUGUG 3' | N/A          |
| microRNA-96      | 5' UUUGGCACUAGCACAUUUUUGUG 3' | N/A          |
| microRNA-145     | 5' GUCCAGUUUCCCCAGGAAUCCCU 3' | N/A          |
| microRNA-143     | 5'GGUGCAGUGCUGCAUCUCUGGU 3'   | N/A          |
| microRNA-490-5p  | 5' CCAUGGAUCUCCAGGUGGGU 3'    | N/A          |
| microRNA-10b-FAM | 5' UACCCUGUAGAACCGAAUUUGUG 3' | 5' 6-FAM     |
| microRNA-96-FAM  | 5' UUUGGCACUAGCACAUUUUUGUG 3' | 3' 6-FAM     |

**Table S3: microRNA-10b calibration curve raw data.**

| microRNA-10b Concentration (nM) | 1255 cm <sup>-1</sup> Peak Intensity (cm <sup>-1</sup> ) | Standard Deviation (cm <sup>-1</sup> ) |
|---------------------------------|----------------------------------------------------------|----------------------------------------|
| 100                             | 440.5                                                    | 32.0                                   |
| 10                              | 409.3                                                    | 35.0                                   |
| 1                               | 344.7                                                    | 40.0                                   |
| 0.1                             | 313.9                                                    | 33.5                                   |
| 0.01                            | 284.6                                                    | 23.5                                   |
| 0.001                           | 277.2                                                    | 30.0                                   |
| 0.0001                          | 206.1                                                    | 27.5                                   |

**Table S4: microRNA-96 calibration curve raw data.**

| microRNA-96<br>Concentration (nM) | 1255 $\text{cm}^{-1}$ Peak<br>Intensity ( $\text{cm}^{-1}$ ) | Standard Deviation<br>( $\text{cm}^{-1}$ ) |
|-----------------------------------|--------------------------------------------------------------|--------------------------------------------|
| 100                               | 497.7                                                        | 50.0                                       |
| 10                                | 428.3                                                        | 35.0                                       |
| 1                                 | 397.1                                                        | 22.9                                       |
| 0.1                               | 362.7                                                        | 30.0                                       |
| 0.01                              | 346.1                                                        | 27.5                                       |
| 0.001                             | 329.4                                                        | 17.3                                       |
| 0.0001                            | 257.4                                                        | 40.0                                       |

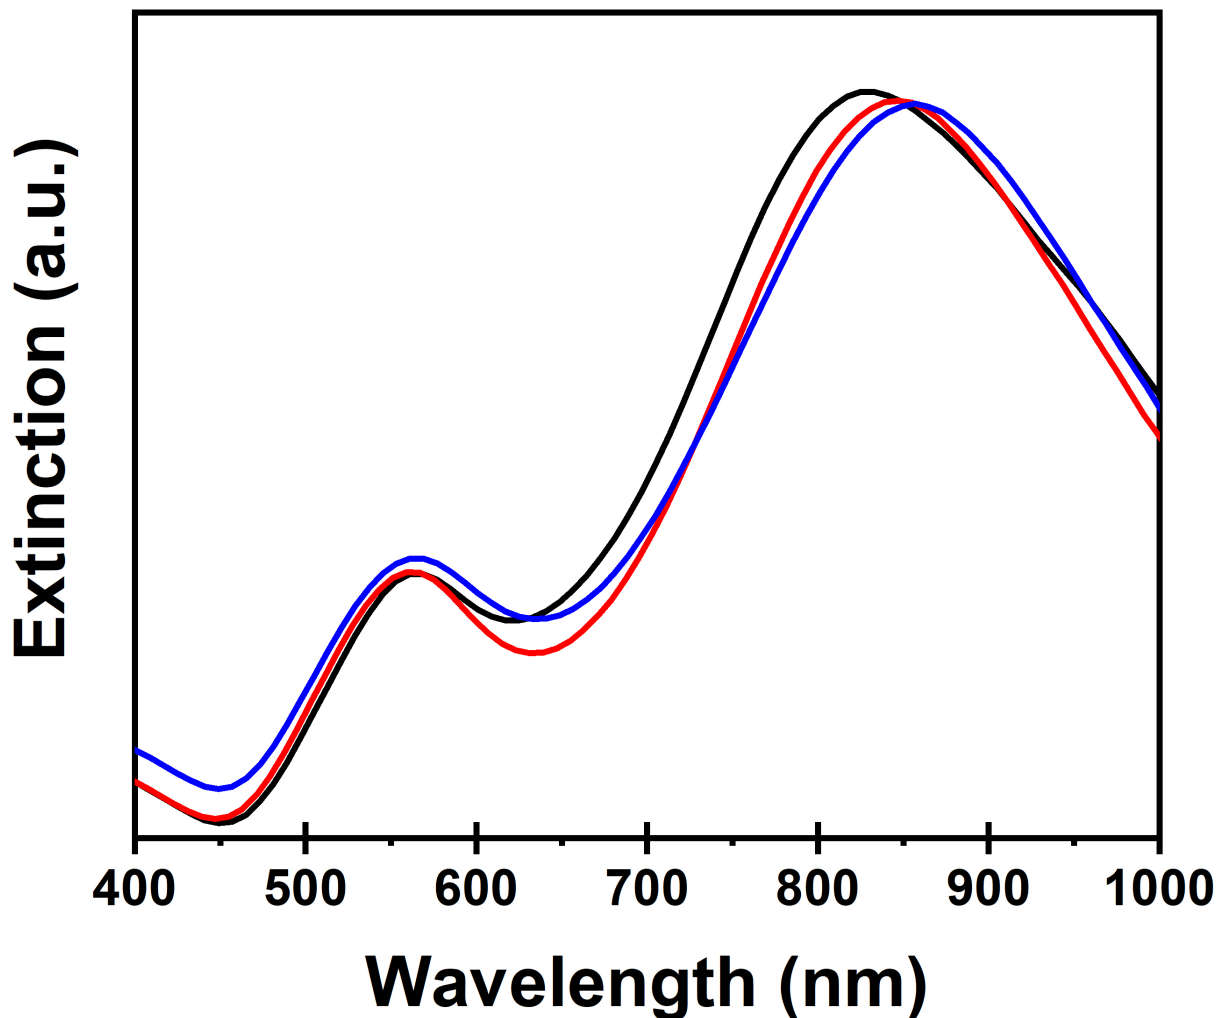

**Fig. S1.** UV-Vis extinction spectra of Au TNPs during the different stages of surface functionalization.

**Black curve:** Extinction spectrum of as synthesized Au TNPs attached onto a silanized glass substrate.

The LSPR dipole peak position ( $\lambda_{LSPR}$ ) of Au TNPs is  $\sim 830$  nm. **Red curve:** Functionalization of TNPs

with  $-S(CH_2)_3$ -ssDNA-10b/96-FAM,  $\lambda_{LSPR} = \sim 845$  nm. Red shifting of the LSPR dipole peak is due to the change in the local refractive index around the nanoprisms upon attachment of  $-S(CH_2)_3$ -ssDNA-10b/96-

FAM. **Blue curve:** Further functionalization of TNPs with 3-MP produces additional red shifts,  $\lambda_{LSPR} =$

$\sim 860$  nm. All spectra were collected in RNAs free water.

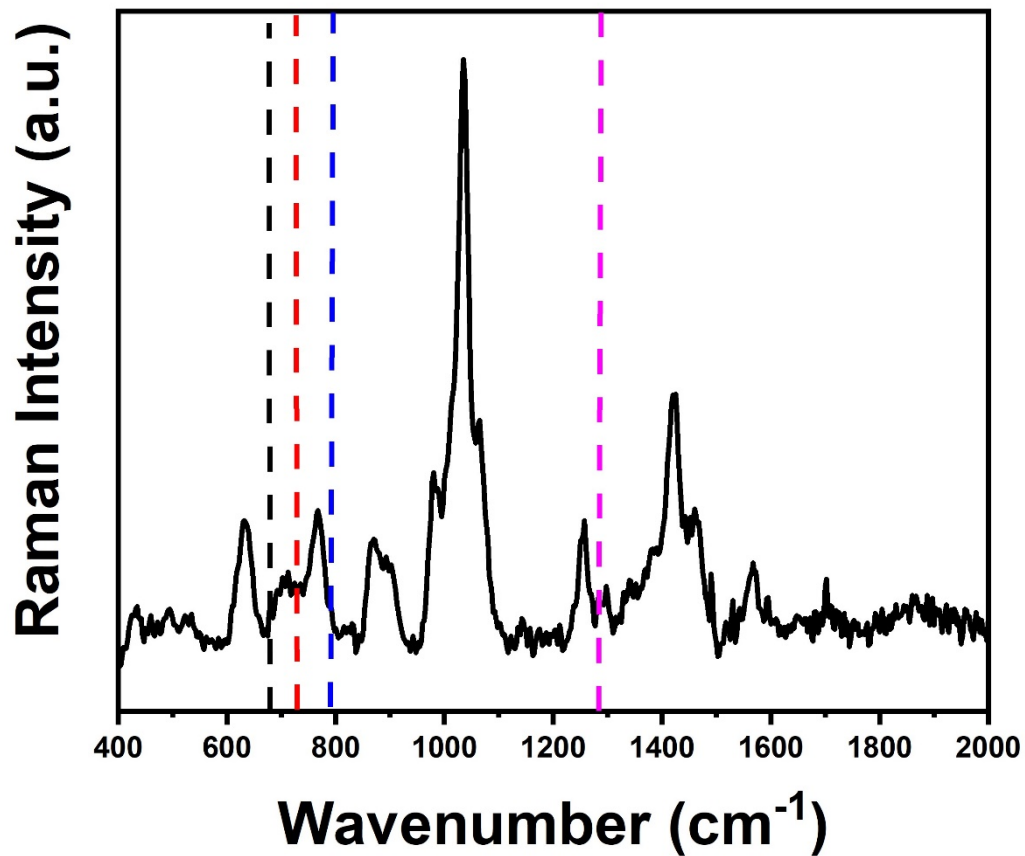

*Fig. S2. SERS spectra of -ssDNA attached onto Au TNPs through the Au-S bond. Guanine ring breathing is represented at  $688\text{ cm}^{-1}$  (black dashed line). Adenine ring breathing is represented at  $733\text{ cm}^{-1}$  (red dashed line). Cytosine ring breathing is represented at  $790\text{ cm}^{-1}$  (blue dashed line). Phosphodiester group of the nucleic acids is represented at  $1289\text{ cm}^{-1}$  (pink dashed line).*

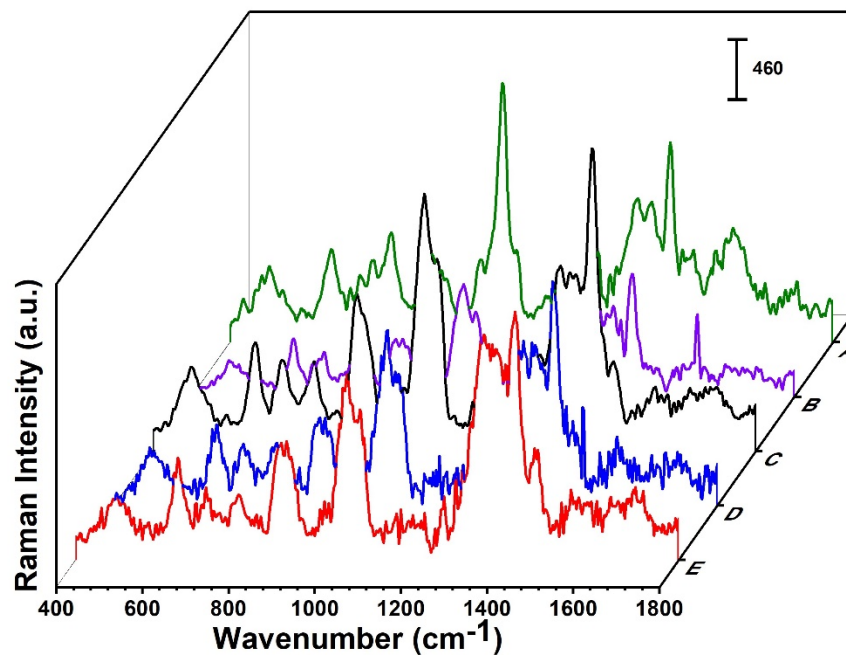

**Fig. S3. SERS spectra of reversibility test.** (A) SERS spectra after attachment of -ssDNA-10b, (B) SERS spectra after attachment of 3-MP, (C) SERS spectra after attachment of microRNA-10b-FAM, (D) SERS spectra after treating with RNase H enzyme solution, and (E) SERS spectra after re-attachment of microRNA-10b-FAM.

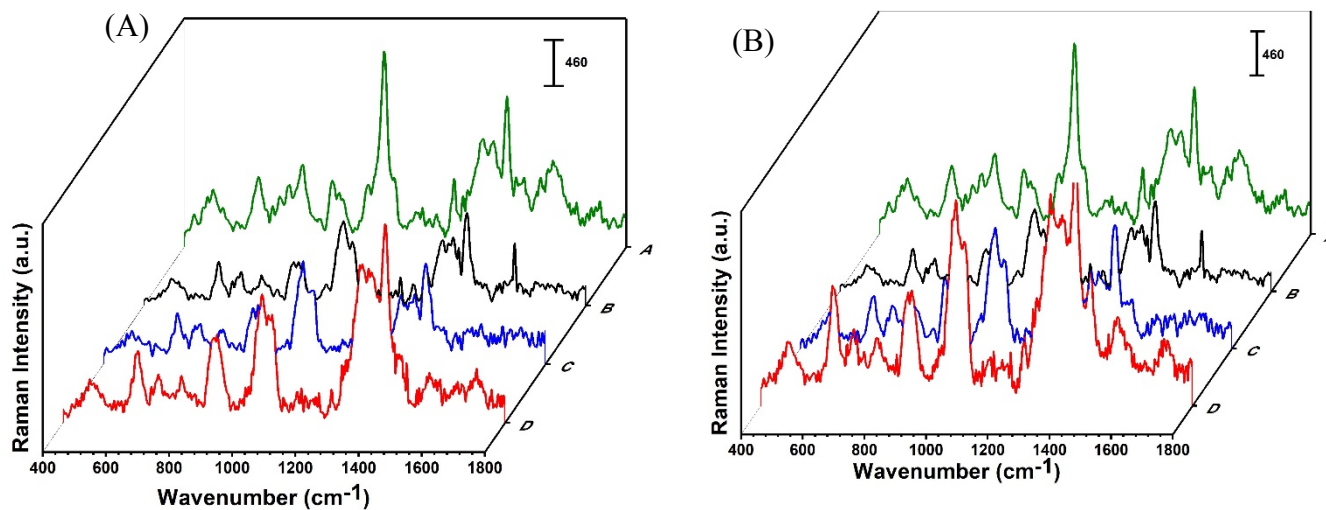

**Fig. S4. SERS spectra of -ssDNA specificity tests.** (A) Representation of SERS spectra for -ssDNA- 10b specificity test. [A = -ssDNA-10b, B = 3-MP, C = mixture of microRNA-96, 145, 143, and 490-5p. D = microRNA-10b.] (B) Representation of SERS spectra for -ssDNA-96 specificity test. [A = -ssDNA-96, B = 3-MP, C = mixture of microRNA-10b, 145, 143, and 490-5p. D = microRNA-96.]
